# Supplementary material for: Transcription-coupled and epigenome-encoded mechanisms direct H3K4 methylation
Source: PubMed Central journal article supplement (PMC9372134; doi:10.1038/s41467-022-32165-8), 2022-08-11
Supplement: 41467_2022_32165_MOESM11_ESM.pdf [file 41467_2022_32165_MOESM11_ESM.pdf]

## Reporting Summary

Nature Portfolio wishes to improve the reproducibility of the work that we publish. This form provides structure for consistency and transparency in reporting. For further information on Nature Portfolio policies, see our [Editorial Policies](#) and the [Editorial Policy Checklist](#).

### Statistics

For all statistical analyses, confirm that the following items are present in the figure legend, table legend, main text, or Methods section.

n/a Confirmed

- The exact sample size ( $n$ ) for each experimental group/condition, given as a discrete number and unit of measurement
- A statement on whether measurements were taken from distinct samples or whether the same sample was measured repeatedly
- The statistical test(s) used AND whether they are one- or two-sided  
*Only common tests should be described solely by name; describe more complex techniques in the Methods section.*
- A description of all covariates tested
- A description of any assumptions or corrections, such as tests of normality and adjustment for multiple comparisons
- A full description of the statistical parameters including central tendency (e.g. means) or other basic estimates (e.g. regression coefficient) AND variation (e.g. standard deviation) or associated estimates of uncertainty (e.g. confidence intervals)
- For null hypothesis testing, the test statistic (e.g.  $F$ ,  $t$ ,  $r$ ) with confidence intervals, effect sizes, degrees of freedom and  $P$  value noted  
*Give  $P$  values as exact values whenever suitable.*
- For Bayesian analysis, information on the choice of priors and Markov chain Monte Carlo settings
- For hierarchical and complex designs, identification of the appropriate level for tests and full reporting of outcomes
- Estimates of effect sizes (e.g. Cohen's  $d$ , Pearson's  $r$ ), indicating how they were calculated

*Our web collection on [statistics for biologists](#) contains articles on many of the points above.*

### Software and code

Policy information about [availability of computer code](#)

Data collection

N/A

Data analysis

```
bowtie2:2.3.3.1
STAR:2.5.3
samtools:1.8--4
bedtools:2.26.0
trimmomatic:0.36--5
MACS2:2.1.1
IGV:2.5.0
ngsplot2.47.1
R3.6
R package: ROCR1.1
R package: viridis0.6.2
R package: randomForest4.6-14
R package: Biostrings2.54.0
R package: qgraph1.9
python3
Python library: pandas0.25.1
Python library: scikit-learn0.21.2
Python library: biopython1.74
```

For manuscripts utilizing custom algorithms or software that are central to the research but not yet described in published literature, software must be made available to editors and reviewers. We strongly encourage code deposition in a community repository (e.g. GitHub). See the Nature Portfolio [guidelines for submitting code & software](#) for further information.

## Data

Policy information about [availability of data](#)

All manuscripts must include a [data availability statement](#). This statement should provide the following information, where applicable:

- Accession codes, unique identifiers, or web links for publicly available datasets
- A description of any restrictions on data availability
- For clinical datasets or third party data, please ensure that the statement adheres to our [policy](#)

The high-throughput sequencing data generated in this study are available in NCBI under the accession number PRJNA732996.

## Field-specific reporting

Please select the one below that is the best fit for your research. If you are not sure, read the appropriate sections before making your selection.

- Life sciences       Behavioural & social sciences       Ecological, evolutionary & environmental sciences

For a reference copy of the document with all sections, see [nature.com/documents/nr-reporting-summary-flat.pdf](https://nature.com/documents/nr-reporting-summary-flat.pdf)

## Life sciences study design

All studies must disclose on these points even when the disclosure is negative.

|                 |                                                                                                                                                                                                                                                                                                                                                                                                                                                                                                                                                                                                                                                                                                                                                                                                                                                                                                                                                                                                                                |
|-----------------|--------------------------------------------------------------------------------------------------------------------------------------------------------------------------------------------------------------------------------------------------------------------------------------------------------------------------------------------------------------------------------------------------------------------------------------------------------------------------------------------------------------------------------------------------------------------------------------------------------------------------------------------------------------------------------------------------------------------------------------------------------------------------------------------------------------------------------------------------------------------------------------------------------------------------------------------------------------------------------------------------------------------------------|
| Sample size     | Sample size (biologically independent replicates) is based on field convention for most of experiments; triplicate for RNA-seq ( <a href="https://genomebiology.biomedcentral.com/articles/10.1186/s13059-016-0881-8#Abs1">https://genomebiology.biomedcentral.com/articles/10.1186/s13059-016-0881-8#Abs1</a> ) and duplicate for ChIP-seq ( <a href="https://genome.cshlp.org/content/genome/22/9/1813.full.html">https://genome.cshlp.org/content/genome/22/9/1813.full.html</a> ).                                                                                                                                                                                                                                                                                                                                                                                                                                                                                                                                         |
| Data exclusions | Scatter plots of NGS-seq signals focus on protein-coding genes, while other transcribed elements such as transposons and tRNA genes are excluded, as stated in legends and within the figure. This is because the focus of this study is regulation over protein-coding genes and not the other genomic elements that are known to be regulated in distinct mechanisms from protein-coding genes.<br>Peaks called within the centromeres are removed, because the centromeres, being highly repetitive and relatively unstable, sometimes attract a large number of artifact peaks. The removed regions here are posted as bedfile in <a href="https://github.com/Satoyo08/Arabidopsis_H3K4me1/data/refs/centromere.bed">https://github.com/Satoyo08/Arabidopsis_H3K4me1/data/refs/centromere.bed</a><br>In the contour plot (Figure.5) genes for which no transcription was detected were excluded as stated in the Method. This is because the zero data points do not contribute to capturing the correlational properties. |
| Replication     | All data except for the supplemental H3K4me0 ChIP-seq (Supplementary Figure 1b), WT-ashh2 H3K4me1 ChIP-seq pairs (Supplementary Fig. 6b), and some in-house generated features used in randomforest are based on multiple biologically independent replicates. The number of replicates for each experiment was stated in the Methods, legend or within figure of the manuscript. At least Triplicate for mRNA-seq and duplicate for ChIP-seq.                                                                                                                                                                                                                                                                                                                                                                                                                                                                                                                                                                                 |
| Randomization   | For all experiments, plants were grown on multiple petridishes, which were placed randomly in the growth chamber. In order not to bias the sampling, the researchers conducting sampling were not aware of sample's genotypes.                                                                                                                                                                                                                                                                                                                                                                                                                                                                                                                                                                                                                                                                                                                                                                                                 |
| Blinding        | During the process of all experiments, the researchers conducting experiments were not aware of sample's genotypes. For processing sequence data and downstream analysis, genotypes were not blinded because it is impractical. However, raw sequence data codes are publicly available, so that reproducibility of the analyses can be tested.                                                                                                                                                                                                                                                                                                                                                                                                                                                                                                                                                                                                                                                                                |

## Reporting for specific materials, systems and methods

We require information from authors about some types of materials, experimental systems and methods used in many studies. Here, indicate whether each material, system or method listed is relevant to your study. If you are not sure if a list item applies to your research, read the appropriate section before selecting a response.

### Materials & experimental systems

| n/a                                 | Involved in the study                                  |
|-------------------------------------|--------------------------------------------------------|
| <input type="checkbox"/>            | <input checked="" type="checkbox"/> Antibodies         |
| <input checked="" type="checkbox"/> | <input type="checkbox"/> Eukaryotic cell lines         |
| <input checked="" type="checkbox"/> | <input type="checkbox"/> Palaeontology and archaeology |
| <input checked="" type="checkbox"/> | <input type="checkbox"/> Animals and other organisms   |
| <input checked="" type="checkbox"/> | <input type="checkbox"/> Human research participants   |
| <input checked="" type="checkbox"/> | <input type="checkbox"/> Clinical data                 |
| <input checked="" type="checkbox"/> | <input type="checkbox"/> Dual use research of concern  |

### Methods

| n/a                                 | Involved in the study                           |
|-------------------------------------|-------------------------------------------------|
| <input type="checkbox"/>            | <input checked="" type="checkbox"/> ChIP-seq    |
| <input checked="" type="checkbox"/> | <input type="checkbox"/> Flow cytometry         |
| <input checked="" type="checkbox"/> | <input type="checkbox"/> MRI-based neuroimaging |

## Antibodies

|                 |                                                                                                                                                                                                                                                                                                                                                                                                                                                                                                                                                                                                                                                                                                                                                       |
|-----------------|-------------------------------------------------------------------------------------------------------------------------------------------------------------------------------------------------------------------------------------------------------------------------------------------------------------------------------------------------------------------------------------------------------------------------------------------------------------------------------------------------------------------------------------------------------------------------------------------------------------------------------------------------------------------------------------------------------------------------------------------------------|
| Antibodies used | As stated in the manuscript, anti-H3 (ab1791; Abcam), H3K4me1 (ab8895; Abcam), H3K4me2 (ab32356; Abcam), H3K4me3 (ab8580; Abcam), H3K4me0 (MAB10301, MBL), H3K36me2 (MAB10332; MBL), H3K36me3 (MAB10333; MBL), H3K27me3 (MAB10323; MBL), H2Bub (MM-0029; Medimabs), H4K16ac (07-329; Millipore), RNAP2 total CTD (MAB10601; MBL), RNAP2 phospho S2 (MAB10602; MBL), RNAP2 phospho S5 (MAB10603; MBL), FLAG (F1804; SIGMA), H4 (raised and gifted by Dr. Akihisa Osakabe), Anti-Rabbit HRP (NA934, cytiva).                                                                                                                                                                                                                                            |
| Validation      | The antibodies are not validated specifically for use in Arabidopsis, but all the antibodies are validated for use in ChIP-seq by suppliers, and extensively used in literatures for ChIP-seq and other purposes in Arabidopsis and other species. We validated each antibody by conducting ChIP-seq and comparing the result with previously reported ChIP-seq results of same protein or modification. We validated the specificity of anti-FLAG by comparing ChIP-seq results of transgenic plants expressing FLAG-tagged protein to non-transgenic wild type plants. Although some vendors sell the anti-H3K4me0 antibody as anti-H3, this antibody is specific to unmodified H3K4 as validated in (Kimura, H et al., 2008. Cell Struct. Funct.). |

## ChIP-seq

### Data deposition

- Confirm that both raw and final processed data have been deposited in a public database such as [GEO](https://www.ncbi.nlm.nih.gov/bioproject/PRJNA732996/).
- Confirm that you have deposited or provided access to graph files (e.g. BED files) for the called peaks.

### Data access links

May remain private before publication.

<https://www.ncbi.nlm.nih.gov/bioproject/PRJNA732996/>

### Files in database submission

```
# title
ChIP-seq of Arabidopsis thaliana: seedling H3K4me1_WT
ChIP-seq of Arabidopsis thaliana: seedling H3K4me1_atx1
ChIP-seq of Arabidopsis thaliana: seedling H3K4me1_atx2
ChIP-seq of Arabidopsis thaliana: seedling H3K4me1_atx3
ChIP-seq of Arabidopsis thaliana: seedling H3K4me1_atx4
ChIP-seq of Arabidopsis thaliana: seedling H3K4me1_atx5
ChIP-seq of Arabidopsis thaliana: seedling H3K4me1_atxr7
ChIP-seq of Arabidopsis thaliana: seedling H3K4me1_WT_2
ChIP-seq of Arabidopsis thaliana: seedling H3K4me1_atx1/atx2
ChIP-seq of Arabidopsis thaliana: seedling H3K4me1_atx1/atxr7
ChIP-seq of Arabidopsis thaliana: seedling H3K4me1_atx2/atxr7
ChIP-seq of Arabidopsis thaliana: seedling H3K4me2_WT_2
ChIP-seq of Arabidopsis thaliana: seedling H3K4me2_atx1/atx2
ChIP-seq of Arabidopsis thaliana: seedling H3K4me2_atx1/atxr7
ChIP-seq of Arabidopsis thaliana: seedling H3K4me2_atx2/atxr7
ChIP-seq of Arabidopsis thaliana: seedling H3K4me3_WT_2
ChIP-seq of Arabidopsis thaliana: seedling H3K4me3_atx1/atx2
ChIP-seq of Arabidopsis thaliana: seedling H3K4me3_atx1/atxr7
ChIP-seq of Arabidopsis thaliana: seedling H3K4me3_atx2/atxr7
ChIP-seq of Arabidopsis thaliana: seedling H3K4me1_WT_3
ChIP-seq of Arabidopsis thaliana: seedling H3K4me1_atx1/2/r7
ChIP-seq of Arabidopsis thaliana: seedling H3K4me1_atx3/4/5
ChIP-seq of Arabidopsis thaliana: seedling H3K4me1_atx3-1/4/5
ChIP-seq of Arabidopsis thaliana: seedling H3K4me1_atxr3
ChIP-seq of Arabidopsis thaliana: seedling H3K4me2_WT_3
ChIP-seq of Arabidopsis thaliana: seedling H3K4me2_atx1/2/r7
ChIP-seq of Arabidopsis thaliana: seedling H3K4me2_atx3/4/5
ChIP-seq of Arabidopsis thaliana: seedling H3K4me2_atx3-1/4/5
ChIP-seq of Arabidopsis thaliana: seedling H3K4me2_atxr3
ChIP-seq of Arabidopsis thaliana: seedling H3K4me3_WT_3
ChIP-seq of Arabidopsis thaliana: seedling H3K4me3_atx1/2/r7
ChIP-seq of Arabidopsis thaliana: seedling H3K4me3_atx3/4/5
ChIP-seq of Arabidopsis thaliana: seedling H3K4me3_atx3-1/4/5
ChIP-seq of Arabidopsis thaliana: seedling H3K4me3_atxr3
ChIP-seq of Arabidopsis thaliana: seedling H3K36me3_WT
ChIP-seq of Arabidopsis thaliana: seedling H3K36me3_atx1/2/r7
ChIP-seq of Arabidopsis thaliana: seedling H3K36me3_WT_for_ashh2
ChIP-seq of Arabidopsis thaliana: seedling H3K36me3_ashh2
ChIP-seq of Arabidopsis thaliana: seedling H3K36me3_WT_for_ashh34r3
ChIP-seq of Arabidopsis thaliana: seedling H3K36me3_ashh3
ChIP-seq of Arabidopsis thaliana: seedling H3K36me3_ashh4
ChIP-seq of Arabidopsis thaliana: seedling H3K36me3_ashr3
ChIP-seq of Arabidopsis thaliana: seedling H3K36me3_WT_for_ashh1
ChIP-seq of Arabidopsis thaliana: seedling H3K36me3_ashh1
ChIP-seq of Arabidopsis thaliana: seedling RNAP2_WT
ChIP-seq of Arabidopsis thaliana: seedling RNAP2_Ser2P_WT
```

ChIP-seq of Arabidopsis thaliana: seedling RNAP2\_Ser5P\_WT  
ChIP-seq of Arabidopsis thaliana: seedling Negative\_control\_for\_ATX(R)s\_rep1  
ChIP-seq of Arabidopsis thaliana: seedling ATX1\_rep1  
ChIP-seq of Arabidopsis thaliana: seedling ATX2\_rep1  
ChIP-seq of Arabidopsis thaliana: seedling ATXR7\_rep1  
ChIP-seq of Arabidopsis thaliana: seedling Negative\_control\_for\_ATXs\_rep2  
ChIP-seq of Arabidopsis thaliana: seedling ATX1\_rep2  
ChIP-seq of Arabidopsis thaliana: seedling ATX2\_rep2  
ChIP-seq of Arabidopsis thaliana: seedling Negative\_control\_for\_ATXR7\_rep2  
ChIP-seq of Arabidopsis thaliana: seedling ATXR7\_rep2  
ChIP-seq of Arabidopsis thaliana: seedling H3K36me2  
ChIP-seq of Arabidopsis thaliana: seedling H3K27me3  
ChIP-seq of Arabidopsis thaliana: seedling H3K4me0\_WT  
ChIP-seq of Arabidopsis thaliana: seedling H3K4me0\_atx1/2/r7  
ChIP-seq of Arabidopsis thaliana: seedling H3\_WT  
ChIP-seq of Arabidopsis thaliana: seedling H3\_atx1  
ChIP-seq of Arabidopsis thaliana: seedling H3\_atx2  
ChIP-seq of Arabidopsis thaliana: seedling H3\_atx3  
ChIP-seq of Arabidopsis thaliana: seedling H3\_atx4  
ChIP-seq of Arabidopsis thaliana: seedling H3\_atx5  
ChIP-seq of Arabidopsis thaliana: seedling H3\_atxr7  
ChIP-seq of Arabidopsis thaliana: seedling H3\_WT\_2  
ChIP-seq of Arabidopsis thaliana: seedling H3\_atx1/atx2  
ChIP-seq of Arabidopsis thaliana: seedling H3\_atx1/atxr7  
ChIP-seq of Arabidopsis thaliana: seedling H3\_atx2/atxr7  
ChIP-seq of Arabidopsis thaliana: seedling H3\_WT\_3  
ChIP-seq of Arabidopsis thaliana: seedling H3\_atx1/2/r7  
ChIP-seq of Arabidopsis thaliana: seedling H3\_atx3/4/5  
ChIP-seq of Arabidopsis thaliana: seedling H3\_atx3-1/4/5  
ChIP-seq of Arabidopsis thaliana: seedling H3\_atxr3  
ChIP-seq of Arabidopsis thaliana: seedling H3K4me1\_WT\_for\_hub\_rep1  
ChIP-seq of Arabidopsis thaliana: seedling H3K4me1\_hub1\_rep1  
ChIP-seq of Arabidopsis thaliana: seedling H3K4me1\_hub2\_rep1  
ChIP-seq of Arabidopsis thaliana: seedling H3K4me1\_WT\_for\_hub\_rep2  
ChIP-seq of Arabidopsis thaliana: seedling H3K4me1\_hub1\_rep2  
ChIP-seq of Arabidopsis thaliana: seedling H3K4me1\_hub2\_rep2  
ChIP-seq of Arabidopsis thaliana: seedling H3\_WT\_for\_hubK4me1\_ashhK36me3\_atx12r7K36me3\_rep2  
ChIP-seq of Arabidopsis thaliana: seedling H3\_hub1\_rep2  
ChIP-seq of Arabidopsis thaliana: seedling H3\_hub2\_rep2  
ChIP-seq of Arabidopsis thaliana: seedling H2Bub\_WT\_rep1  
ChIP-seq of Arabidopsis thaliana: seedling H2Bub\_atx1/2/r7\_rep1  
ChIP-seq of Arabidopsis thaliana: seedling H2Bub\_WT\_rep2  
ChIP-seq of Arabidopsis thaliana: seedling H2Bub\_atx1/2/r7\_rep2  
ChIP-seq of Arabidopsis thaliana: seedling H4K16ac\_WT\_rep1  
ChIP-seq of Arabidopsis thaliana: seedling H4K16ac\_atx1/2/r7\_rep1  
ChIP-seq of Arabidopsis thaliana: seedling H4K16ac\_WT\_rep2  
ChIP-seq of Arabidopsis thaliana: seedling H4K16ac\_atx1/2/r7\_rep2  
ChIP-seq of Arabidopsis thaliana: seedling H3K36me3\_WT\_for\_ashhs\_atx1/2/r7\_rep2  
ChIP-seq of Arabidopsis thaliana: seedling H3K36me3\_ashh1\_rep2  
ChIP-seq of Arabidopsis thaliana: seedling H3K36me3\_ashh2\_rep2  
ChIP-seq of Arabidopsis thaliana: seedling H3K36me3\_ashh3\_rep2  
ChIP-seq of Arabidopsis thaliana: seedling H3K36me3\_ashh4\_rep2  
ChIP-seq of Arabidopsis thaliana: seedling H3K36me3\_ashr3\_rep2  
ChIP-seq of Arabidopsis thaliana: seedling H3K36me3\_atx1/2/r7\_rep2  
ChIP-seq of Arabidopsis thaliana: seedling H3\_ashh1\_rep2  
ChIP-seq of Arabidopsis thaliana: seedling H3\_ashh2\_rep2  
ChIP-seq of Arabidopsis thaliana: seedling H3\_ashh3\_rep2  
ChIP-seq of Arabidopsis thaliana: seedling H3\_ashh4\_rep2  
ChIP-seq of Arabidopsis thaliana: seedling H3\_ashr3\_rep2  
ChIP-seq of Arabidopsis thaliana: seedling ATX2\_HUB2\_rep1  
ChIP-seq of Arabidopsis thaliana: seedling ATX2\_hub2\_rep1  
ChIP-seq of Arabidopsis thaliana: seedling ATX2\_HUB2\_rep2  
ChIP-seq of Arabidopsis thaliana: seedling ATX2\_hub2\_rep2  
ChIP-seq of Arabidopsis thaliana: seedling H3K4me1\_WT\_spike\_in  
ChIP-seq of Arabidopsis thaliana: seedling H3K4me1\_atx1\_spike\_in  
ChIP-seq of Arabidopsis thaliana: seedling H3K4me1\_atx2\_spike\_in  
ChIP-seq of Arabidopsis thaliana: seedling H3K4me1\_atxr7\_spike\_in  
ChIP-seq of Arabidopsis thaliana: seedling H3K4me1\_atx1/atx2\_spike\_in  
ChIP-seq of Arabidopsis thaliana: seedling H3K4me1\_atx1/atxr7\_spike\_in  
ChIP-seq of Arabidopsis thaliana: seedling H3K4me1\_atx2/atxr7\_spike\_in  
ChIP-seq of Arabidopsis thaliana: seedling H3K4me1\_atx1/atx2/atxr7\_spike\_in  
ChIP-seq of Arabidopsis thaliana: seedling H3\_WT\_spike\_in  
ChIP-seq of Arabidopsis thaliana: seedling H3\_atx1\_spike\_in  
ChIP-seq of Arabidopsis thaliana: seedling H3\_atx2\_spike\_in  
ChIP-seq of Arabidopsis thaliana: seedling H3\_atxr7\_spike\_in  
ChIP-seq of Arabidopsis thaliana: seedling H3\_atx1/atx2\_spike\_in

ChIP-seq of Arabidopsis thaliana: seedling H3\_atx1/atxr7\_spike\_in  
 ChIP-seq of Arabidopsis thaliana: seedling H3\_atx2/atxr7\_spike\_in  
 ChIP-seq of Arabidopsis thaliana: seedling H3\_atx1/atx2/atxr7\_spike\_in  
 ChIP-seq of Arabidopsis thaliana: seedling H3K4me1\_WT\_4  
 ChIP-seq of Arabidopsis thaliana: seedling H3K4me1\_atx1/2/r7\_4  
 ChIP-seq of Arabidopsis thaliana: seedling H3K4me1\_atx3/4/5\_4  
 ChIP-seq of Arabidopsis thaliana: seedling H3K4me1\_atxr3\_4  
 ChIP-seq of Arabidopsis thaliana: seedling H3K4me2\_WT\_4  
 ChIP-seq of Arabidopsis thaliana: seedling H3K4me2\_atx1/2/r7\_4  
 ChIP-seq of Arabidopsis thaliana: seedling H3K4me2\_atx3/4/5\_4  
 ChIP-seq of Arabidopsis thaliana: seedling H3K4me2\_atxr3\_4  
 ChIP-seq of Arabidopsis thaliana: seedling H3K4me3\_WT\_4  
 ChIP-seq of Arabidopsis thaliana: seedling H3K4me3\_atx1/2/r7\_4  
 ChIP-seq of Arabidopsis thaliana: seedling H3K4me3\_atx3/4/5\_4  
 ChIP-seq of Arabidopsis thaliana: seedling H3K4me3\_atxr3\_4  
 ChIP-seq of Arabidopsis thaliana: seedling H3\_WT\_4  
 ChIP-seq of Arabidopsis thaliana: seedling H3\_atx1/2/r7\_4  
 ChIP-seq of Arabidopsis thaliana: seedling H3\_atx3/4/5\_4  
 ChIP-seq of Arabidopsis thaliana: seedling H3\_atxr3\_4  
 ChIP-seq of Arabidopsis thaliana: seedling H3K4me1\_WT\_for\_ashh2  
 ChIP-seq of Arabidopsis thaliana: seedling H3K4me1\_ashh2

Genome browser session  
 (e.g. [UCSC](#))

*Provide a link to an anonymized genome browser session for "Initial submission" and "Revised version" documents only, to enable peer review. Write "no longer applicable" for "Final submission" documents.*

## Methodology

Replicates

All ChIP-seq experiments were conducted with 2 biological replicates, except for one pair of supplemental result (H3K4me0 ChIP-seq, Used only in Supplementary Fig. 1b) and in-house generated feature data used for random forest (H3K27me3, H3K36me2 etc), which were validated against published datasets.

Sequencing depth

# title #pair/single #read length # reads processed: # reads with at least one reported alignment:  
 ChIP-seq of Arabidopsis thaliana: seedling H3K4me1\_WT single 50 bp 17760699 15658338  
 ChIP-seq of Arabidopsis thaliana: seedling H3K4me1\_atx1 single 50 bp 18320643 12075622  
 ChIP-seq of Arabidopsis thaliana: seedling H3K4me1\_atx2 single 50 bp 9692518 6555752  
 ChIP-seq of Arabidopsis thaliana: seedling H3K4me1\_atx3 single 50 bp 11270052 7475471  
 ChIP-seq of Arabidopsis thaliana: seedling H3K4me1\_atx4 single 50 bp 18760044 17217011  
 ChIP-seq of Arabidopsis thaliana: seedling H3K4me1\_atx5 single 50 bp 22530325 19892414  
 ChIP-seq of Arabidopsis thaliana: seedling H3K4me1\_atxr7 single 50 bp 9738380 9024365  
 ChIP-seq of Arabidopsis thaliana: seedling H3K4me1\_WT\_2 single 50 bp 26627834 23346131  
 ChIP-seq of Arabidopsis thaliana: seedling H3K4me1\_atx1/atx2 single 50 bp 31492251 26581246  
 ChIP-seq of Arabidopsis thaliana: seedling H3K4me1\_atx1/atxr7 single 50 bp 36011321 30501585  
 ChIP-seq of Arabidopsis thaliana: seedling H3K4me1\_atx2/atxr7 single 50 bp 28761373 25124284  
 ChIP-seq of Arabidopsis thaliana: seedling H3K4me2\_WT\_2 single 50 bp 18538238 16668710  
 ChIP-seq of Arabidopsis thaliana: seedling H3K4me2\_atx1/atx2 single 50 bp 16814321 14887538  
 ChIP-seq of Arabidopsis thaliana: seedling H3K4me2\_atx1/atxr7 single 50 bp 21702186 18739036  
 ChIP-seq of Arabidopsis thaliana: seedling H3K4me2\_atx2/atxr7 single 50 bp 22507846 20178072  
 ChIP-seq of Arabidopsis thaliana: seedling H3K4me3\_WT\_2 single 50 bp 20103517 17894143  
 ChIP-seq of Arabidopsis thaliana: seedling H3K4me3\_atx1/atx2 single 50 bp 20400992 18427950  
 ChIP-seq of Arabidopsis thaliana: seedling H3K4me3\_atx1/atxr7 single 50 bp 19897725 16944106  
 ChIP-seq of Arabidopsis thaliana: seedling H3K4me3\_atx2/atxr7 single 50 bp 22370476 20453119  
 ChIP-seq of Arabidopsis thaliana: seedling H3K4me1\_WT\_3 single 50 bp 22074773 19408019  
 ChIP-seq of Arabidopsis thaliana: seedling H3K4me1\_atx1/2/r7 single 50 bp 29069108 25214413  
 ChIP-seq of Arabidopsis thaliana: seedling H3K4me1\_atx3/4/5 single 50 bp 30188277 26024603  
 ChIP-seq of Arabidopsis thaliana: seedling H3K4me1\_atx3-1/4/5 single 50 bp 21581387 19623596  
 ChIP-seq of Arabidopsis thaliana: seedling H3K4me1\_atxr3 single 50 bp 26610839 23544954  
 ChIP-seq of Arabidopsis thaliana: seedling H3K4me2\_WT\_3 single 50 bp 14427601 12100846  
 ChIP-seq of Arabidopsis thaliana: seedling H3K4me2\_atx1/2/r7 single 50 bp 18869714 16530029  
 ChIP-seq of Arabidopsis thaliana: seedling H3K4me2\_atx3/4/5 single 50 bp 18936894 16710281  
 ChIP-seq of Arabidopsis thaliana: seedling H3K4me2\_atx3-1/4/5 single 50 bp 12494313 11499649  
 ChIP-seq of Arabidopsis thaliana: seedling H3K4me2\_atxr3 single 50 bp 33526424 30685139  
 ChIP-seq of Arabidopsis thaliana: seedling H3K4me3\_WT\_3 single 50 bp 14236122 12325706  
 ChIP-seq of Arabidopsis thaliana: seedling H3K4me3\_atx1/2/r7 single 50 bp 16434992 14098641  
 ChIP-seq of Arabidopsis thaliana: seedling H3K4me3\_atx3/4/5 single 50 bp 17573210 15556475  
 ChIP-seq of Arabidopsis thaliana: seedling H3K4me3\_atx3-1/4/5 single 50 bp 14946431 13632089  
 ChIP-seq of Arabidopsis thaliana: seedling H3K4me3\_atxr3 single 50 bp 18034881 15663641  
 ChIP-seq of Arabidopsis thaliana: seedling H3K36me3\_WT single 50 bp 23838211 21322101  
 ChIP-seq of Arabidopsis thaliana: seedling H3K36me3\_atx1/2/r7 single 50 bp 25079619 21901322  
 ChIP-seq of Arabidopsis thaliana: seedling H3K36me3\_WT\_for\_ashh2 single 50 bp 40049535 36947896  
 ChIP-seq of Arabidopsis thaliana: seedling H3K36me3\_ashh2 single 50 bp 42394630 9420919  
 ChIP-seq of Arabidopsis thaliana: seedling H3K36me3\_WT\_for\_ashh34r3 single 50 bp 24359631 21915675  
 ChIP-seq of Arabidopsis thaliana: seedling H3K36me3\_ashh3 single 50 bp 26825064 25052714  
 ChIP-seq of Arabidopsis thaliana: seedling H3K36me3\_ashh4 single 50 bp 28437980 26080426  
 ChIP-seq of Arabidopsis thaliana: seedling H3K36me3\_ashr3 single 50 bp 21323535 19413721  
 ChIP-seq of Arabidopsis thaliana: seedling H3K36me3\_WT\_for\_ashh1 single 50 bp 16378522

ChIP-seq of Arabidopsis thaliana: seedling H3K36me3\_ashh1 single 50 bp 19310669  
 ChIP-seq of Arabidopsis thaliana: seedling RNAP2\_WT single 50 bp 25207211 20737479  
 ChIP-seq of Arabidopsis thaliana: seedling RNAP2\_Ser2P\_WT single 50 bp 23206212 19254621  
 ChIP-seq of Arabidopsis thaliana: seedling RNAP2\_Ser5P\_WT single 50 bp 24404755 20684758  
 ChIP-seq of Arabidopsis thaliana: seedling Negative\_control\_for\_ATX(R)s\_rep1 single 50 bp 32596690 20942543  
 ChIP-seq of Arabidopsis thaliana: seedling ATX1\_rep1 single 50 bp 41948815 30928804  
 ChIP-seq of Arabidopsis thaliana: seedling ATX2\_rep1 single 50 bp 45881080 38136170  
 ChIP-seq of Arabidopsis thaliana: seedling ATXR7\_rep1 single 50 bp 38116550 31413116  
 ChIP-seq of Arabidopsis thaliana: seedling Negative\_control\_for\_ATXs\_rep1 single 50 bp 17188787 7224982  
 ChIP-seq of Arabidopsis thaliana: seedling ATX1\_rep2 single 50 bp 19735258 10599041  
 ChIP-seq of Arabidopsis thaliana: seedling ATX2\_rep2 single 50 bp 23923463 18057821  
 ChIP-seq of Arabidopsis thaliana: seedling Negative\_control\_for\_ATXR7\_rep2 single 50 bp 16069780 10287180  
 ChIP-seq of Arabidopsis thaliana: seedling ATXR7\_rep2 single 50 bp 15493671 13155327  
 ChIP-seq of Arabidopsis thaliana: seedling H3K36me2 single 50 bp 24395250 20808938  
 ChIP-seq of Arabidopsis thaliana: seedling H3K27me3 single 50 bp 24645334 21359639  
 ChIP-seq of Arabidopsis thaliana: seedling H3K4me0\_WT single 50 bp 12209773 5635842  
 ChIP-seq of Arabidopsis thaliana: seedling H3K4me0\_atx1/2/r7 single 50 bp 12006500 5998395  
 ChIP-seq of Arabidopsis thaliana: seedling H3\_WT single 50 bp 11219811 10274228  
 ChIP-seq of Arabidopsis thaliana: seedling H3\_atx1 single 50 bp 19780122 13259187  
 ChIP-seq of Arabidopsis thaliana: seedling H3\_atx2 single 50 bp 24469936 15988292  
 ChIP-seq of Arabidopsis thaliana: seedling H3\_atx3 single 50 bp 13406514 9342586  
 ChIP-seq of Arabidopsis thaliana: seedling H3\_atx4 single 50 bp 24018242 16262987  
 ChIP-seq of Arabidopsis thaliana: seedling H3\_atx5 single 50 bp 21076517 19021454  
 ChIP-seq of Arabidopsis thaliana: seedling H3\_atxr7 single 50 bp 11217912 10366340  
 ChIP-seq of Arabidopsis thaliana: seedling H3\_WT\_2 single 50 bp 28215424 18140439  
 ChIP-seq of Arabidopsis thaliana: seedling H3\_atx1/atx2 single 50 bp 27578849 17613587  
 ChIP-seq of Arabidopsis thaliana: seedling H3\_atx1/atxr7 single 50 bp 26543809 16121770  
 ChIP-seq of Arabidopsis thaliana: seedling H3\_atx2/atxr7 single 50 bp 27892978 18975000  
 ChIP-seq of Arabidopsis thaliana: seedling H3\_WT\_3 single 50 bp 28264715 18773802  
 ChIP-seq of Arabidopsis thaliana: seedling H3\_atx1/2/r7 single 50 bp 21692680 15009989  
 ChIP-seq of Arabidopsis thaliana: seedling H3\_atx3/4/5 single 50 bp 22144850 14524623  
 ChIP-seq of Arabidopsis thaliana: seedling H3\_atx3-1/4/5 single 50 bp 16890959 10924738  
 ChIP-seq of Arabidopsis thaliana: seedling H3\_atxr3 single 50 bp 25588692 16954459  
 ChIP-seq of Arabidopsis thaliana: seedling H3K4me1\_WT\_for\_hub\_rep1 paired 150 bp 63238646 62952519  
 ChIP-seq of Arabidopsis thaliana: seedling H3K4me1\_hub1\_rep1 paired 150 bp 57129940 56852753  
 ChIP-seq of Arabidopsis thaliana: seedling H3K4me1\_hub2\_rep1 paired 150 bp 54989014 54758074  
 ChIP-seq of Arabidopsis thaliana: seedling H3K4me1\_WT\_for\_hub\_rep2 paired 150 bp 21403950 19947571  
 ChIP-seq of Arabidopsis thaliana: seedling H3K4me1\_hub1\_rep2 paired 150 bp 21809654 20699006  
 ChIP-seq of Arabidopsis thaliana: seedling H3K4me1\_hub2\_rep2 paired 150 bp 21587476 18872252  
 ChIP-seq of Arabidopsis thaliana: seedling H3\_WT\_for\_hubK4me1\_ashhK36me3\_atx12r7K36me3\_rep2 paired 150 bp 23984260 22408709  
 ChIP-seq of Arabidopsis thaliana: seedling H3\_hub1\_rep2 paired 150 bp 24450524 23386543  
 ChIP-seq of Arabidopsis thaliana: seedling H3\_hub2\_rep2 paired 150 bp 25368480 23820041  
 ChIP-seq of Arabidopsis thaliana: seedling H2Bub\_WT\_rep1 paired 150 bp 35115138 16520608  
 ChIP-seq of Arabidopsis thaliana: seedling H2Bub\_atx1/2/r7\_rep1 paired 150 bp 31297396 21006377  
 ChIP-seq of Arabidopsis thaliana: seedling H2Bub\_WT\_rep2 paired 150 bp 28482728 20084488  
 ChIP-seq of Arabidopsis thaliana: seedling H2Bub\_atx1/2/r7\_rep2 paired 150 bp 26804924 17356915  
 ChIP-seq of Arabidopsis thaliana: seedling H4K16ac\_WT\_rep1 paired 150 bp 44615412 42361508  
 ChIP-seq of Arabidopsis thaliana: seedling H4K16ac\_atx1/2/r7\_rep1 paired 150 bp 50977738 48301869  
 ChIP-seq of Arabidopsis thaliana: seedling H4K16ac\_WT\_rep2 paired 150 bp 20403606 16762746  
 ChIP-seq of Arabidopsis thaliana: seedling H4K16ac\_atx1/2/r7\_rep2 paired 150 bp 20472204 15689765  
 ChIP-seq of Arabidopsis thaliana: seedling H3K36me3\_WT\_for\_ashhs\_atx1/2/r7\_rep2 paired 150 bp 22179488 20425018  
 ChIP-seq of Arabidopsis thaliana: seedling H3K36me3\_ashh1\_rep2 paired 150 bp 21514354 20705123  
 ChIP-seq of Arabidopsis thaliana: seedling H3K36me3\_ashh2\_rep2 paired 150 bp 18335104 17730236  
 ChIP-seq of Arabidopsis thaliana: seedling H3K36me3\_ashh3\_rep2 paired 150 bp 19176826 18511267  
 ChIP-seq of Arabidopsis thaliana: seedling H3K36me3\_ashh4\_rep2 paired 150 bp 18479002 17754373  
 ChIP-seq of Arabidopsis thaliana: seedling H3K36me3\_ashr3\_rep2 paired 150 bp 27755088 26064705  
 ChIP-seq of Arabidopsis thaliana: seedling H3K36me3\_atx1/2/r7\_rep2 paired 150 bp 16811452 15248961  
 ChIP-seq of Arabidopsis thaliana: seedling H3\_ashh1\_rep2 paired 150 bp 23183660 21149689  
 ChIP-seq of Arabidopsis thaliana: seedling H3\_ashh2\_rep2 paired 150 bp 21295188 19374727  
 ChIP-seq of Arabidopsis thaliana: seedling H3\_ashh3\_rep2 paired 150 bp 22965566 22139955  
 ChIP-seq of Arabidopsis thaliana: seedling H3\_ashh4\_rep2 paired 150 bp 20634818 19569056  
 ChIP-seq of Arabidopsis thaliana: seedling H3\_ashr3\_rep2 paired 150 bp 27018718 24972395  
 ChIP-seq of Arabidopsis thaliana: seedling ATX2\_HUB2\_rep1 paired 150 bp 12817508 11996632  
 ChIP-seq of Arabidopsis thaliana: seedling ATX2\_hub2\_rep1 paired 150 bp 31061348 28460608  
 ChIP-seq of Arabidopsis thaliana: seedling ATX2\_HUB2\_rep2 paired 150 bp 33845004 19988483  
 ChIP-seq of Arabidopsis thaliana: seedling ATX2\_hub2\_rep2 paired 150 bp 22350634 20572270  
 ChIP-seq of Arabidopsis thaliana: seedling H3K4me1\_WT\_spike\_in paired 150 bp 31105318 26711253  
 ChIP-seq of Arabidopsis thaliana: seedling H3K4me1\_atx1\_spike\_in paired 150 bp 28562542 24565168  
 ChIP-seq of Arabidopsis thaliana: seedling H3K4me1\_atx2\_spike\_in paired 150 bp 30317590 22876304  
 ChIP-seq of Arabidopsis thaliana: seedling H3K4me1\_atxr7\_spike\_in paired 150 bp 28907610 24072398  
 ChIP-seq of Arabidopsis thaliana: seedling H3K4me1\_atx1/atx2\_spike\_in paired 150 bp 31965890 25507738  
 ChIP-seq of Arabidopsis thaliana: seedling H3K4me1\_atx1/atxr7\_spike\_in paired 150 bp 26822188 24775741  
 ChIP-seq of Arabidopsis thaliana: seedling H3K4me1\_atx2/atxr7\_spike\_in paired 150 bp 32688976 27500247  
 ChIP-seq of Arabidopsis thaliana: seedling H3K4me1\_atx1/atx2/atxr7\_spike\_in paired 150 bp 40833852 31173522  
 ChIP-seq of Arabidopsis thaliana: seedling H3\_WT\_spike\_in paired 150 bp 35611368 31378322

|                         |                                                                                                                                                                                                                                                                                                                                                                                                                                                                                                                                                                                                                                                                                                                                                                                                                                                                                                                                                                                                                                                                                                                                                                                                                                                                                                                                                                                                                                                                                                                                                                                                                                                                                                                                                                                                                                                                                                                                                                                                                                                                                                                                                                                                                                                                                                                                                                                                                                                                                                                                |
|-------------------------|--------------------------------------------------------------------------------------------------------------------------------------------------------------------------------------------------------------------------------------------------------------------------------------------------------------------------------------------------------------------------------------------------------------------------------------------------------------------------------------------------------------------------------------------------------------------------------------------------------------------------------------------------------------------------------------------------------------------------------------------------------------------------------------------------------------------------------------------------------------------------------------------------------------------------------------------------------------------------------------------------------------------------------------------------------------------------------------------------------------------------------------------------------------------------------------------------------------------------------------------------------------------------------------------------------------------------------------------------------------------------------------------------------------------------------------------------------------------------------------------------------------------------------------------------------------------------------------------------------------------------------------------------------------------------------------------------------------------------------------------------------------------------------------------------------------------------------------------------------------------------------------------------------------------------------------------------------------------------------------------------------------------------------------------------------------------------------------------------------------------------------------------------------------------------------------------------------------------------------------------------------------------------------------------------------------------------------------------------------------------------------------------------------------------------------------------------------------------------------------------------------------------------------|
|                         | <p>ChIP-seq of Arabidopsis thaliana: seedling H3_atx1_spike_in paired 150 bp 29455752 27329718<br/> ChIP-seq of Arabidopsis thaliana: seedling H3_atx2_spike_in paired 150 bp 25665118 24008405<br/> ChIP-seq of Arabidopsis thaliana: seedling H3_atxr7_spike_in paired 150 bp 32876612 31296762<br/> ChIP-seq of Arabidopsis thaliana: seedling H3_atx1/atx2_spike_in paired 150 bp 24710624 22995531<br/> ChIP-seq of Arabidopsis thaliana: seedling H3_atx1/atxr7_spike_in paired 150 bp 29380732 28598870<br/> ChIP-seq of Arabidopsis thaliana: seedling H3_atx2/atxr7_spike_in paired 150 bp 29548854 27514967<br/> ChIP-seq of Arabidopsis thaliana: seedling H3_atx1/atx2/atxr7_spike_in paired 150 bp 34194922 31885883<br/> ChIP-seq of Arabidopsis thaliana: seedling H3K4me1_WT_4 paired 150 bp 28050272 24526584<br/> ChIP-seq of Arabidopsis thaliana: seedling H3K4me1_atx1/2/r7_4 paired 150 bp 29926844 19117687<br/> ChIP-seq of Arabidopsis thaliana: seedling H3K4me1_atx3/4/5_4 paired 150 bp 21659882 18468221<br/> ChIP-seq of Arabidopsis thaliana: seedling H3K4me1_atxr3_4 paired 150 bp 26109196 21989128<br/> ChIP-seq of Arabidopsis thaliana: seedling H3K4me2_WT_4 paired 150 bp 12151350 10867100<br/> ChIP-seq of Arabidopsis thaliana: seedling H3K4me2_atx1/2/r7_4 paired 150 bp 10570556 8438303<br/> ChIP-seq of Arabidopsis thaliana: seedling H3K4me2_atx3/4/5_4 paired 150 bp 17453610 13821438<br/> ChIP-seq of Arabidopsis thaliana: seedling H3K4me2_atxr3_4 paired 150 bp 10796008 9187892<br/> ChIP-seq of Arabidopsis thaliana: seedling H3K4me3_WT_4 paired 150 bp 13327778 10524449<br/> ChIP-seq of Arabidopsis thaliana: seedling H3K4me3_atx1/2/r7_4 paired 150 bp 12051598 9374062<br/> ChIP-seq of Arabidopsis thaliana: seedling H3K4me3_atx3/4/5_4 paired 150 bp 11992600 9293764<br/> ChIP-seq of Arabidopsis thaliana: seedling H3K4me3_atxr3_4 paired 150 bp 15853870 10598950<br/> ChIP-seq of Arabidopsis thaliana: seedling H3_WT_4 paired 150 bp 18752936 17954692<br/> ChIP-seq of Arabidopsis thaliana: seedling H3_atx1/2/r7_4 paired 150 bp 21218320 19239655<br/> ChIP-seq of Arabidopsis thaliana: seedling H3_atx3/4/5_4 paired 150 bp 21542808 18638854<br/> ChIP-seq of Arabidopsis thaliana: seedling H3_atxr3_4 paired 150 bp 20291266 16809696<br/> ChIP-seq of Arabidopsis thaliana: seedling H3K4me1_WT_for_ashh2 single 50 bp 26879160 24217033<br/> ChIP-seq of Arabidopsis thaliana: seedling H3K4me1_ashh2 single 50 bp 20195428 18172424</p> |
| Antibodies              | anti-H3 (ab1791; Abcam), H3K4me1 (ab8895; Abcam), H3K4me2 (ab32356; Abcam), H3K4me3 (ab8580; Abcam), H3K4me0 (MABI0301; MBL), H3K36me2 (MABI0332; MBL), H3K36me3 (MABI0333; MBL), H3K27me3 (MABI0323; MBL), H2Bub (MM-0029; Medimabs), H4K16ac (07-329; Millipore), RNAP2 total CTD (MABI0601; MBL), RNAP2 phospho S2 (MABI0602; MBL), RNAP2 phospho S5 (MABI0603; MBL), FLAG (F1804; SIGMA)                                                                                                                                                                                                                                                                                                                                                                                                                                                                                                                                                                                                                                                                                                                                                                                                                                                                                                                                                                                                                                                                                                                                                                                                                                                                                                                                                                                                                                                                                                                                                                                                                                                                                                                                                                                                                                                                                                                                                                                                                                                                                                                                   |
| Peak calling parameters | As stated in the method section, all peaks were called with MACS2. Differentially modified regions were identified by comparing mutant to WT using MACS2 with option -g 1.3e8. Enrichment peaks of H3K4 methyltransferases were identified by comparing against negative control (ChIP-seq done with FLAG antibody in non-transgenic WT) with two settings; the default(-g 1.3e8) and more relaxed option (-q 0.3 --nomodel -g 1.3e8). Both counts are provided as Supplementary Data.3 and the latter was used for Fig.2 d and Supplementary Fig. 5c.                                                                                                                                                                                                                                                                                                                                                                                                                                                                                                                                                                                                                                                                                                                                                                                                                                                                                                                                                                                                                                                                                                                                                                                                                                                                                                                                                                                                                                                                                                                                                                                                                                                                                                                                                                                                                                                                                                                                                                         |
| Data quality            | Data quality estimation was based on the mapping statistics and the visual inspection in IGV browser, metaplot, and scatterplot comparing replicates.                                                                                                                                                                                                                                                                                                                                                                                                                                                                                                                                                                                                                                                                                                                                                                                                                                                                                                                                                                                                                                                                                                                                                                                                                                                                                                                                                                                                                                                                                                                                                                                                                                                                                                                                                                                                                                                                                                                                                                                                                                                                                                                                                                                                                                                                                                                                                                          |
| Software                | bowtie2:2.3.3.1<br>STAR:2.5.3<br>samtools:1.8--4<br>bedtools:2.26.0<br>trimmomatic:0.36--5<br>MACS2:2.1.1<br>IGV:2.5.0<br>ngsplot:2.47.1                                                                                                                                                                                                                                                                                                                                                                                                                                                                                                                                                                                                                                                                                                                                                                                                                                                                                                                                                                                                                                                                                                                                                                                                                                                                                                                                                                                                                                                                                                                                                                                                                                                                                                                                                                                                                                                                                                                                                                                                                                                                                                                                                                                                                                                                                                                                                                                       |
